# Supplementary material for: Placement accuracy of resuscitative endovascular occlusion balloon into the target zone with external measurement
Source: PubMed Central journal article supplement — Trauma Surg Acute Care Open. 2020 Apr 29;5(1):e000443. doi: 10.1136/tsaco-2020-000443 (PMC7228664; doi:10.1136/tsaco-2020-000443), 2020-04-29
Supplement: tsaco-2020-000443supp001.pdf [file tsaco-2020-000443supp001.pdf]

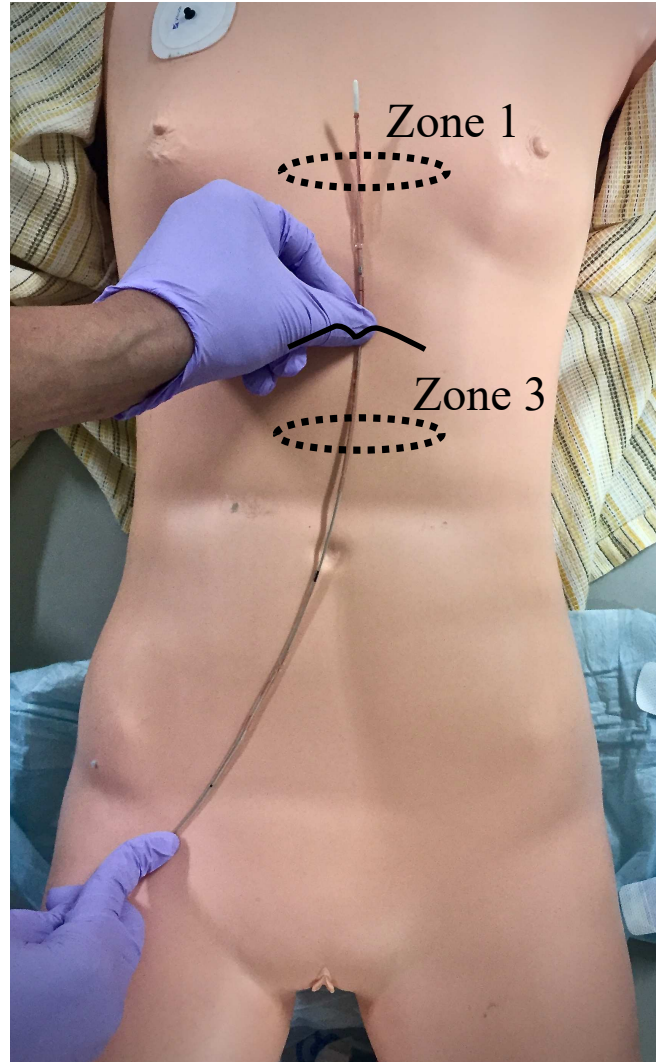

**Supplemental file 1.** External measurement method using external landmarks with the REBOA catheter to estimate the distance into the target zone.

For Zone 1 placement, the center of the balloon was placed at the level of the nipples and extended to the access site through the umbilicus. For Zone 3 placement, the center of the balloon was placed at 5 cm above the umbilicus and extended to the access site through the umbilicus.
