# Supplementary material for: Placement accuracy of resuscitative endovascular occlusion balloon into the target zone with external measurement
Source: PubMed Central journal article supplement — Trauma Surg Acute Care Open. 2020 Apr 29;5(1):e000443. doi: 10.1136/tsaco-2020-000443 (PMC7228664; doi:10.1136/tsaco-2020-000443), 2020-04-29
Supplement: tsaco-2020-000443supp002.pdf [file tsaco-2020-000443supp002.pdf]

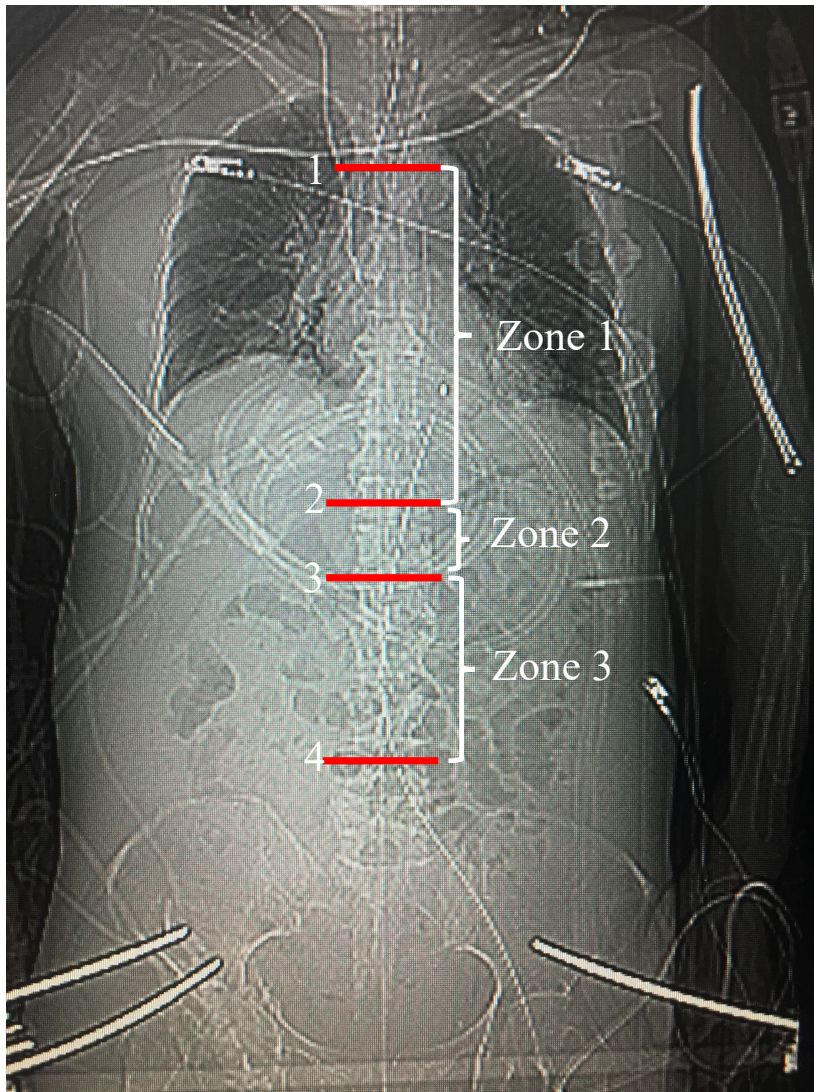

**Supplemental file 2.** Perceptible vertebral landmarks on X-ray image for REBOA placement zone

(1) The superior boundary of Zone 1 is the midlevel of the T4 vertebra, (2) the inferior boundary of Zone 1 is the midlevel of the Th12 vertebra, (3) the inferior boundary of Zone 2 is the L1-L2 intervertebral disc level, and (4) the inferior boundary of Zone 3 is the midlevel of the L4 vertebra.
