# Supplementary material for: Placement accuracy of resuscitative endovascular occlusion balloon into the target zone with external measurement
Source: PubMed Central journal article supplement — Trauma Surg Acute Care Open. 2020 Apr 29;5(1):e000443. doi: 10.1136/tsaco-2020-000443 (PMC7228664; doi:10.1136/tsaco-2020-000443), 2020-04-29

**Supplemental file 3.** Annual number of patients who underwent REBOA across the study period and according to their target placement.

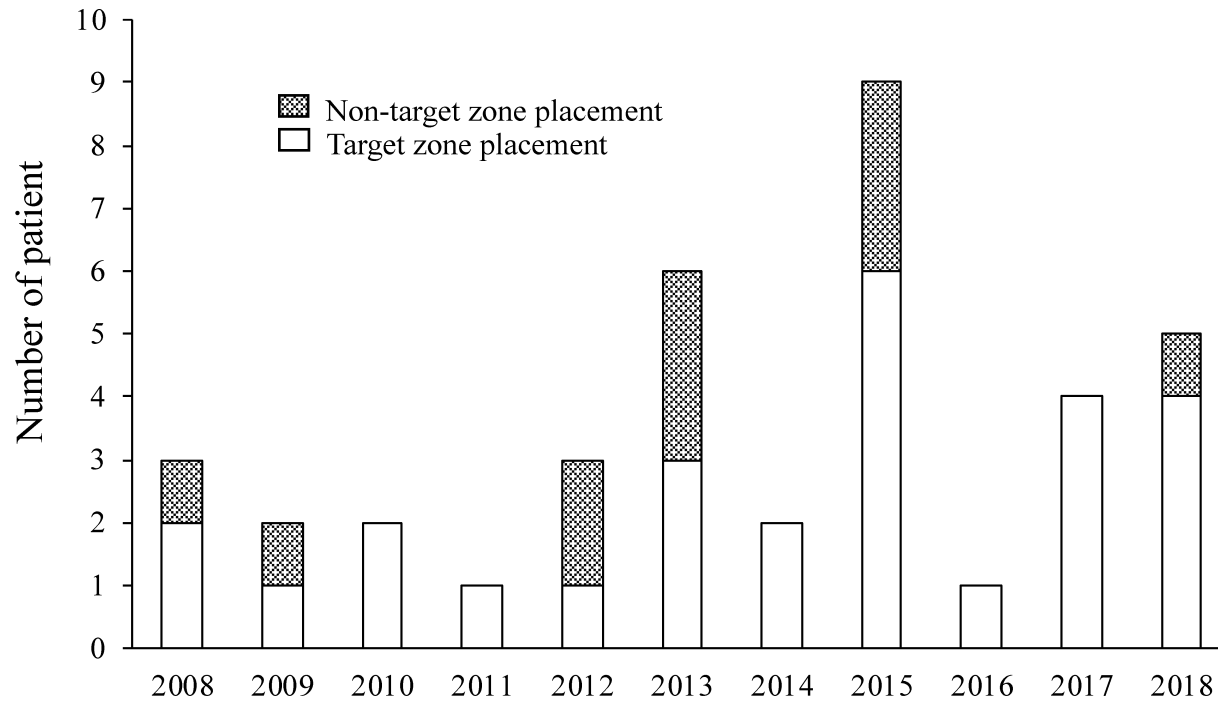

Supplement: tsaco-2020-000443supp003.pdf [file tsaco-2020-000443supp003.pdf]
