# Supplementary material for: Placement accuracy of resuscitative endovascular occlusion balloon into the target zone with external measurement
Source: PubMed Central journal article supplement — Trauma Surg Acute Care Open. 2020 Apr 29;5(1):e000443. doi: 10.1136/tsaco-2020-000443 (PMC7228664; doi:10.1136/tsaco-2020-000443), 2020-04-29
Supplement: tsaco-2020-000443supp004.pdf [file tsaco-2020-000443supp004.pdf]

**Supplemental Digital Content 4.** Advantages and disadvantages of REBOA placement methods

| Method               | Advantages                     | Disadvantages                                                           |
|----------------------|--------------------------------|-------------------------------------------------------------------------|
| Portable X-ray       | Easily available               | Increased procedure time                                                |
|                      | Radiological visualization     | Non-real time procedure                                                 |
|                      | High reliability               | Need for X-ray equipment or portable X-ray machine                      |
| Fluoroscopy          | Radiological visualization     | Resource problem (fluoroscopic system and radiation control room, etc.) |
|                      | Real-time procedure            |                                                                         |
|                      | High reliability               |                                                                         |
| Ultrasonography      | Ultrasonographic visualization | Need for sonography and sonographer                                     |
|                      | Real-time procedure            | Limited visual field                                                    |
|                      | High reliability               | Time-consuming if using transesophageal echocardiography                |
| Fixed-distance model | Quick and easily available     | Technically difficult                                                   |
|                      | Not need any special equipment | Individual variability                                                  |
| External measurement | Quick and easily available     | Blind placement                                                         |
|                      | Not need any special equipment | Lack accuracy                                                           |
|                      |                                | Blind placement                                                         |
